# Supplementary material
Source: Springer Nature journal article supplement (https://www.springermedizin.de/resource/supplementary/12968_2012_2627_MOESM3_ESM.pdf/9582358)

# CMR vs SPECT

Male Study Population

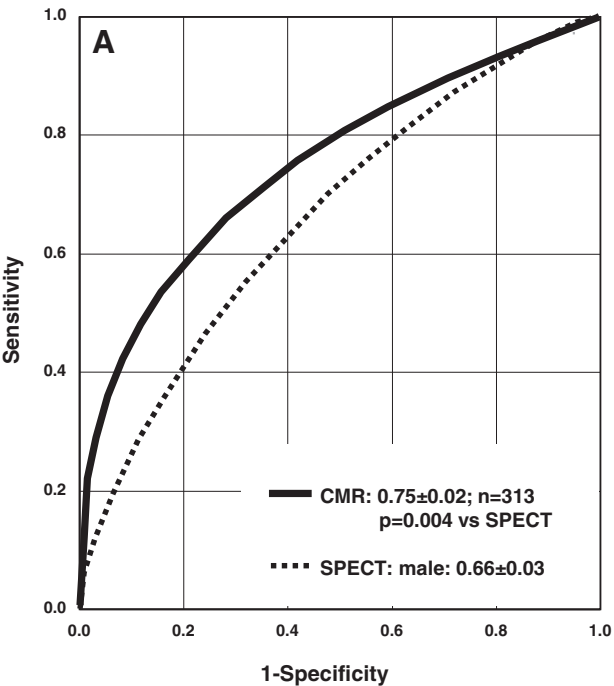

# CMR vs SPECT

Female Study Population

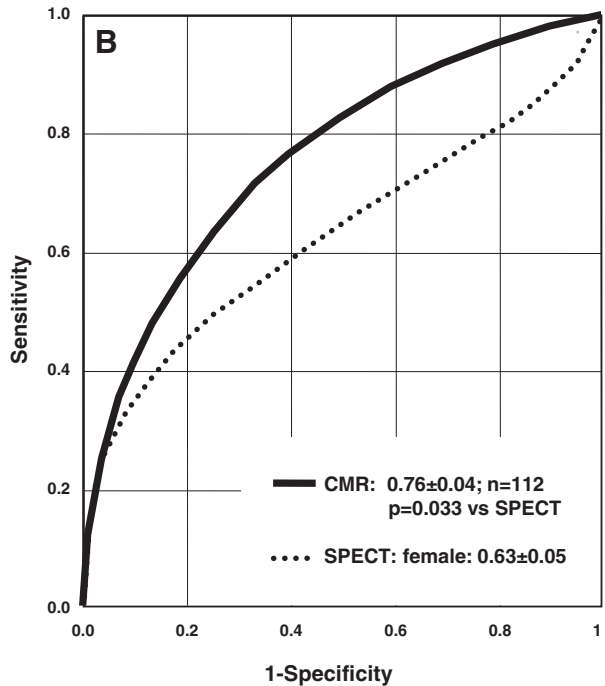

Supplement: MOESM3 [file 9582358]
